# Supplementary material for: Effectiveness and Safety of Nivolumab in Child–Pugh B Patients with Hepatocellular Carcinoma: A Real-World Cohort Study
Source: PubMed Central journal article supplement (PMC7409289; doi:10.3390/cancers12071968), 2020-07-20
Supplement: cancers-12-01968-s001.pdf [file cancers-12-01968-s001.pdf]

Article

# Effectiveness and Safety of Nivolumab in Child–Pugh B Patients with Hepatocellular Carcinoma: A Real-World Cohort Study

Won-Mook Choi, Danbi Lee, Ju Hyun Shim, Kang Mo Kim, Young-Suk Lim, Han Chu Lee, Changhoon Yoo, Sook Ryun Park, Min-Hee Ryu, Baek-Yeol Ryoo and Jonggi Choi

**Table S1.** Univariate and multivariable analyses for overall survival of the study population.

| Characteristics                              | Univariate Analysis |                | Multivariable Analysis |                |
|----------------------------------------------|---------------------|----------------|------------------------|----------------|
|                                              | HR (95% CI)         | <i>p</i> Value | AHR (95% CI)           | <i>p</i> Value |
| Child-Pugh class                             |                     |                |                        |                |
| A                                            | 1 (reference)       | 0.013          | 1 (reference)          | < 0.001        |
| B                                            | 3.02 (2.15–4.24)    |                | 2.10 (1.38–3.19)       |                |
| Age (per one-year increase)                  | 0.99 (0.98–1.00)    | 0.191          | -                      | -              |
| Sex                                          |                     |                |                        |                |
| Female                                       | 1 (reference)       | 0.378          | -                      | -              |
| Male                                         | 0.82 (0.53–1.27)    |                |                        |                |
| ECOG                                         |                     |                |                        |                |
| 0                                            | 1 (reference)       |                | 1 (reference)          |                |
| 1                                            | 2.49 (1.70–3.62)    | < 0.001        | 2.24 (1.50–3.33)       | < 0.001        |
| 2                                            | 7.86 (4.59–13.45)   | < 0.001        | 5.43 (3.10–9.52)       | < 0.001        |
| ALBI grade                                   |                     |                |                        |                |
| 2                                            | 1 (reference)       |                | 1 (reference)          |                |
| 3                                            | 2.23 (1.34–3.72)    | 0.002          | 1.49 (0.87–2.56)       | 0.144          |
|                                              | 4.87 (2.48–9.53)    | < 0.001        | 2.51 (1.13–5.57)       | 0.023          |
| Etiology                                     |                     |                |                        |                |
| HBV                                          | 1 (reference)       | 0.186          | -                      | -              |
| Non-HBV etiology                             | 0.74 (0.47–1.16)    |                |                        |                |
| BCLC stage                                   |                     |                |                        |                |
| B                                            | 1 (reference)       | 0.417          | -                      | -              |
| C                                            | 1.45 (0.59–3.54)    |                |                        |                |
| $\alpha$ -Fetoprotein, ng/mL                 |                     |                |                        |                |
| < 400                                        | 1 (reference)       | < 0.001        | 1 (reference)          | 0.008          |
| $\geq$ 400                                   | 1.92 (1.37–2.69)    |                | 1.62 (1.13–2.31)       |                |
| PIVKA-II, mAU/mL                             |                     |                |                        |                |
| < 2000                                       | 1 (reference)       | 0.010          | 1 (reference)          | 0.943          |
| $\geq$ 2000                                  | 1.54 (1.11–2.14)    |                | 1.01 (0.71–1.45)       |                |
| Portal vein invasion, present                | 1.69 (1.22–2.35)    | 0.002          | 1.17 (0.80–1.72)       | 0.412          |
| Extrahepatic metastasis, present             | 0.93 (0.53–1.66)    | 0.813          | -                      | -              |
| Involved disease sites, present              |                     |                |                        |                |
| Liver                                        | 2.51 (1.49–4.22)    | < 0.001        | 1.39 (0.76–2.53)       | 0.283          |
| Lung                                         | 1.28 (0.91–1.80)    | 0.162          | -                      | -              |
| Number of involved disease sites per patient |                     |                |                        |                |
| 1–2                                          | 1 (reference)       | < 0.001        | 1 (reference)          | 0.107          |
| $\geq$ 3                                     | 1.74 (1.26–2.42)    |                | 1.35 (0.94–1.95)       |                |

Abbreviations: AHR; adjusted hazard ratio; ALBI, albumin-bilirubin; BCLC, Barcelona Clinic Liver Cancer; CI, confidence interval; ECOG, Eastern Cooperative Oncology Group; HBV, hepatitis B virus; HR, hazard ratio; PIVKA, protein induced by vitamin K absence or antagonist-II.

**Table S2.** Univariate and multivariable analyses for progression-free survival of the study population.

| Characteristics                              | Univariate Analysis |         | Multivariable Analysis |         |
|----------------------------------------------|---------------------|---------|------------------------|---------|
|                                              | HR (95% CI)         | p Value | AHR (95% CI)           | p Value |
| Child-Pugh class                             |                     |         |                        |         |
| A                                            | 1 (reference)       | 0.001   | 1 (reference)          | 0.430   |
| B                                            | 1.67 (1.22–2.29)    |         | 1.17 (0.79–1.72)       |         |
| Age (per one-year increase)                  | 0.98 (0.97–1.00)    | 0.017   | 0.98 (0.97–1.00)       | 0.048   |
| Sex                                          |                     |         |                        |         |
| Female                                       | 1 (reference)       | 0.959   | -                      | -       |
| Male                                         | 1.01 (0.68–1.50)    |         |                        |         |
| ECOG                                         |                     |         |                        |         |
| 0                                            | 1 (reference)       |         | 1 (reference)          |         |
| 1                                            | 2.17 (1.55–3.04)    | < 0.001 | 2.07 (1.44–2.98)       | < 0.001 |
| 2                                            | 4.20 (2.52–7.00)    | < 0.001 | 3.22 (1.89–5.49)       | < 0.001 |
| ALBI grade                                   |                     |         |                        |         |
| 1                                            | 1 (reference)       |         | 1 (reference)          |         |
| 2                                            | 1.51 (0.98–2.32)    | 0.059   | 1.15 (0.72–1.82)       | 0.556   |
| 3                                            | 2.12 (1.16–3.85)    | 0.014   | 1.40 (0.67–2.91)       | 0.370   |
| Etiology                                     |                     |         |                        |         |
| HBV                                          | 1 (reference)       | 0.143   | -                      | -       |
| Non-HBV etiology                             | 0.73 (0.48–1.11)    |         |                        |         |
| BCLC stage                                   |                     |         |                        |         |
| B                                            | 1 (reference)       | 0.524   | -                      | -       |
| C                                            | 1.30 (0.58–2.95)    |         |                        |         |
| $\alpha$ -Fetoprotein, ng/mL                 |                     |         |                        |         |
| < 400                                        | 1 (reference)       | 0.015   | 1 (reference)          | 0.751   |
| $\geq$ 400                                   | 1.45 (1.08–1.96)    |         | 1.05 (0.77–1.45)       |         |
| PIVKA-II, mAU/mL                             |                     |         |                        |         |
| < 2000                                       | 1 (reference)       | < 0.001 | 1 (reference)          | 0.141   |
| $\geq$ 2000                                  | 1.71 (1.27–2.32)    |         | 1.28 (0.92–1.77)       |         |
| Portal vein invasion, present                | 1.48 (1.10–2.00)    | 0.010   | 0.95 (0.67–1.35)       | 0.782   |
| Extrahepatic metastasis, present             | 0.84 (0.50–1.42)    | 0.520   | -                      | -       |
| Involved disease sites, present              |                     |         |                        |         |
| Liver                                        | 2.58 (1.64–4.06)    | < 0.001 | 1.77 (1.04–3.02)       | 0.036   |
| Lung                                         | 1.36 (1.00–1.86)    | 0.051   | -                      | -       |
| Number of involved disease sites per patient |                     |         |                        |         |
| 1–2                                          | 1 (reference)       | < 0.001 | 1 (reference)          | 0.139   |
| $\geq$ 3                                     | 1.74 (1.29–2.36)    |         | 1.28 (0.92–1.79)       |         |

Abbreviations: AHR; adjusted hazard ratio; ALBI, albumin-bilirubin; BCLC, Barcelona Clinic Liver Cancer; CI, confidence interval; ECOG, Eastern Cooperative Oncology Group; HBV, hepatitis B virus; HR, hazard ratio; PIVKA, protein induced by vitamin K absence or antagonist-II.

**Table S3.** Univariate and multivariable analyses for overall survival of Child-Pugh B patients.

| Characteristics             | Univariate Analysis |         | Multivariable Analysis |         |
|-----------------------------|---------------------|---------|------------------------|---------|
|                             | HR (95% CI)         | p Value | AHR (95% CI)           | p Value |
| Child-Pugh score            |                     |         |                        |         |
| 7                           | 1 (reference)       | 0.058   | 1 (reference)          | 0.020   |
| 8–9                         | 1.64 (0.98–2.72)    |         | 1.93 (1.11–3.35)       |         |
| Age (per one-year increase) | 0.98 (0.95–1.00)    | 0.068   | -                      | -       |
| Sex                         |                     |         |                        |         |
| Female                      | 1 (reference)       | 0.659   | -                      | -       |
| Male                        | 1.15 (0.62–2.13)    |         |                        |         |
| ECOG                        |                     |         |                        |         |

|                                              |                  |       |                  |       |
|----------------------------------------------|------------------|-------|------------------|-------|
| 0                                            | 1 (reference)    |       | 1 (reference)    |       |
| 1                                            | 2.18 (1.17–4.07) | 0.015 | 2.10 (1.10–4.01) | 0.025 |
| 2                                            | 3.52 (1.61–7.71) | 0.002 | 3.96 (1.73–9.03) | 0.001 |
| ALBI grade                                   |                  |       |                  |       |
| 2                                            | 1 (reference)    | 0.690 | -                | -     |
| 3                                            | 1.12 (0.64–1.94) |       |                  |       |
| Etiology                                     |                  |       |                  |       |
| HBV                                          | 1 (reference)    | 0.120 | -                | -     |
| Non-HBV etiology                             | 0.58 (0.29–1.15) |       |                  |       |
| BCLC stage                                   |                  |       |                  |       |
| B                                            | 1 (reference)    | 0.875 | -                | -     |
| C                                            | 1.12 (0.27–4.62) |       |                  |       |
| $\alpha$ -Fetoprotein, ng/mL                 |                  |       |                  |       |
| <400                                         | 1 (reference)    | 0.019 | 1 (reference)    | 0.307 |
| $\geq$ 400                                   | 1.95 (1.12–3.41) |       | 1.38 (0.74–2.57) |       |
| PIVKA-II, mAU/mL                             |                  |       |                  |       |
| <2000                                        | 1 (reference)    | 0.845 | -                | -     |
| $\geq$ 2000                                  | 1.05 (0.62–1.79) |       |                  |       |
| Portal vein invasion, present                | 1.86 (1.09–3.19) | 0.024 | 1.34 (0.74–2.44) | 0.331 |
| Extrahepatic metastasis, present             | 1.28 (0.55–2.99) | 0.566 | -                | -     |
| Involved disease sites, present              |                  |       |                  |       |
| Liver                                        | 1.72 (0.62–4.78) | 0.297 | -                | -     |
| Lung                                         | 1.77 (1.01–3.09) | 0.045 | 2.20 (1.17–4.13) | 0.014 |
| Number of involved disease sites per patient |                  |       |                  |       |
| 1–2                                          | 1 (reference)    | 0.070 | -                | -     |
| $\geq$ 3                                     | 1.60 (0.96–2.66) |       |                  |       |

Abbreviations: AHR; adjusted hazard ratio; ALBI, albumin-bilirubin; BCLC, Barcelona Clinic Liver Cancer; CI, confidence interval; ECOG, Eastern Cooperative Oncology Group; HBV, hepatitis B virus; HR, hazard ratio; PIVKA, protein induced by vitamin K absence or antagonist-II.

**Table S4.** Univariate and multivariable analyses for progression-free survival of Child-Pugh B patients.

| Characteristics              | Univariate Analysis |                | Multivariable Analysis |                |
|------------------------------|---------------------|----------------|------------------------|----------------|
|                              | HR (95% CI)         | <i>p</i> Value | AHR (95% CI)           | <i>p</i> Value |
| Child-Pugh score             |                     |                |                        |                |
| 7                            | 1 (reference)       | 0.416          | 1 (reference)          | 0.153          |
| 8–9                          | 1.23 (0.74–2.04)    |                | 1.53 (0.86–2.58)       |                |
| Age (per one-year increase)  | 0.98 (0.95–1.00)    | 0.102          | -                      | -              |
| Gender                       |                     |                |                        |                |
| Female                       | 1 (reference)       | 0.409          | -                      | -              |
| Male                         | 1.28 (0.71–2.30)    |                |                        |                |
| ECOG                         |                     |                |                        |                |
| 0                            | 1 (reference)       |                | 1 (reference)          |                |
| 1                            | 1.60 (0.86–2.96)    | 0.137          | 1.40 (0.75–2.61)       | 0.288          |
| 2                            | 2.36 (1.06–5.24)    | 0.036          | 2.31 (1.03–5.18)       | 0.042          |
| ALBI grade                   |                     |                |                        |                |
| 2                            | 1 (reference)       | 0.789          | -                      | -              |
| 3                            | 1.08 (0.63–1.85)    |                |                        |                |
| Etiology                     |                     |                |                        |                |
| HBV                          | 1 (reference)       | 0.279          | -                      | -              |
| Non-HBV etiology             | 0.70 (0.36–1.34)    |                |                        |                |
| BCLC stage                   |                     |                |                        |                |
| B                            | 1 (reference)       | 0.518          | -                      | -              |
| C                            | 1.92 (0.27–13.92)   |                |                        |                |
| $\alpha$ -Fetoprotein, ng/mL |                     |                |                        |                |
|                              |                     | 0.150          | -                      | -              |

|                                              |                  |       |                  |       |
|----------------------------------------------|------------------|-------|------------------|-------|
| <400                                         | 1 (reference)    |       |                  |       |
| ≥400                                         | 1.47 (0.87–2.48) |       |                  |       |
| PIVKA-II, mAU/mL                             |                  |       |                  |       |
| <2000                                        | 1 (reference)    | 0.326 | -                | -     |
| ≥2000                                        | 1.31 (0.77–2.23) |       |                  |       |
| Portal vein invasion, present                | 1.92 (1.14–3.25) | 0.015 | 1.44 (0.82–2.51) | 0.202 |
| Extrahepatic metastasis, present             | 1.39 (0.55–3.49) | 0.482 | -                | -     |
| Involved disease sites, present              |                  |       |                  |       |
| Liver                                        | 1.85 (0.67–5.13) | 0.235 | -                | -     |
| Lung                                         | 2.33 (1.31–4.16) | 0.004 | 2.38 (1.27–4.46) | 0.007 |
| Number of involved disease sites per patient |                  |       |                  |       |
| 1–2                                          | 1 (reference)    | 0.100 | -                | -     |
| ≥3                                           | 1.52 (0.92–2.52) |       |                  |       |

Abbreviations: AHR; adjusted hazard ratio; ALBI, albumin-bilirubin; BCLC, Barcelona Clinic Liver Cancer; CI, confidence interval; ECOG, Eastern Cooperative Oncology Group; HBV, hepatitis B virus; HR, hazard ratio; PIVKA, protein induced by vitamin K absence or antagonist-II.

**Table S5.** Predictive factors for disease control in Child-Pugh B patients.

| Characteristics                              | Univariate Analysis |         | Multivariable Analysis |         |
|----------------------------------------------|---------------------|---------|------------------------|---------|
|                                              | OR (95% CI)         | p Value | AOR (95% CI)           | p Value |
| Child-Pugh score                             |                     |         |                        |         |
| 7                                            | 1 (reference)       | 0.662   | -                      | -       |
| 8–9                                          | 0.77 (0.25–2.43)    |         |                        |         |
| Age (per one-year increase)                  | 1.05 (0.99–1.12)    | 0.133   | -                      | -       |
| Gender                                       |                     |         |                        |         |
| Female                                       | 1 (reference)       | 0.667   | -                      | -       |
| Male                                         | 0.75 (0.20–2.78)    |         |                        |         |
| Ascites, present                             | 0.37 (0.12–1.18)    | 0.093   | -                      | -       |
| α-Fetoprotein, ng/mL                         |                     |         |                        |         |
| <400                                         | 1 (reference)       | 0.593   | -                      | -       |
| ≥400                                         | 0.73 (0.24–2.27)    |         |                        |         |
| PIVKA-II, mAU/mL                             |                     |         |                        |         |
| <2000                                        | 1 (reference)       | 0.806   | -                      | -       |
| ≥2000                                        | 1.16 (0.35–3.83)    |         |                        |         |
| Albumin (per 1 g/dL increase)                | 0.31 (0.08–1.27)    | 0.104   | -                      | -       |
| Total bilirubin (per 1 mg/dL increase)       | 0.65 (0.34–1.25)    | 0.195   | -                      | -       |
| ALBI grade                                   |                     |         |                        |         |
| 2                                            | 1 (reference)       | 0.979   | -                      | -       |
| 3                                            | 1.02 (0.31–3.38)    |         |                        |         |
| Etiology                                     |                     |         |                        |         |
| HBV                                          | 1 (reference)       |         | -                      | -       |
| Non-HBV etiology                             | 2.32 (0.65–8.32)    | 0.195   |                        |         |
| Portal vein invasion, present                | 0.32 (0.10–1.00)    | 0.051   | -                      | -       |
| Extrahepatic metastasis, present             | 0.17 (0.03–0.88)    | 0.034   | 0.52 (0.06–4.58)       | 0.557   |
| Involved disease sites, present              |                     |         |                        |         |
| Liver                                        | 1.18 (0.12–11.34)   | 0.888   | -                      | -       |
| Lung                                         | 0.13 (0.04–0.44)    | 0.001   | 0.14 (0.03–0.64)       | 0.011   |
| Number of involved disease sites per patient |                     |         |                        |         |
| 1–2                                          | 1 (reference)       | 0.036   | 1 (reference)          | 0.856   |
| ≥3                                           | 0.41 (0.18–0.94)    |         | 1.12 (0.33–3.80)       |         |

Abbreviations: AOR; adjusted odds ratio; ALBI, albumin-bilirubin; CI, confidence interval; HBV, hepatitis B virus; OR, odds ratio; PIVKA, protein induced by vitamin K absence or antagonist-II.
